# Supplementary material for: A highly salt concentrated ethylene carbonate-based self-standing copolymer electrolyte for solid-state lithium metal batteries
Source: Royal Society of Chemistry journal article supplement (doi:10.1039/d4ta03543g), 2024-01-01
Supplement: d4ta03543g1.pdf [file d4ta03543g1.pdf]

*Supplementary Information*

Highly salt concentrated ethylene carbonate-based self-  
standing copolymer electrolyte for solid-state lithium  
metal battery

*Nantapat Soontornnon<sup>a</sup>, Kento Kimura<sup>b</sup>, and Yoichi Tominaga<sup>a\*</sup>*

<sup>a</sup> Graduate School of Bio-Applications and Systems Engineering (BASE), Tokyo University of  
Agriculture and Technology, 2-21-16 Nakacho, Koganei, Tokyo 184-8588, Japan

<sup>b</sup> Department of Applied Chemistry, Graduate School of Engineering, Tokyo University of  
Agriculture and Technology, 2-21-16 Nakacho, Koganei, Tokyo 184-8588, Japan

\* Corresponding author: ytominag@cc.tuat.ac.jp

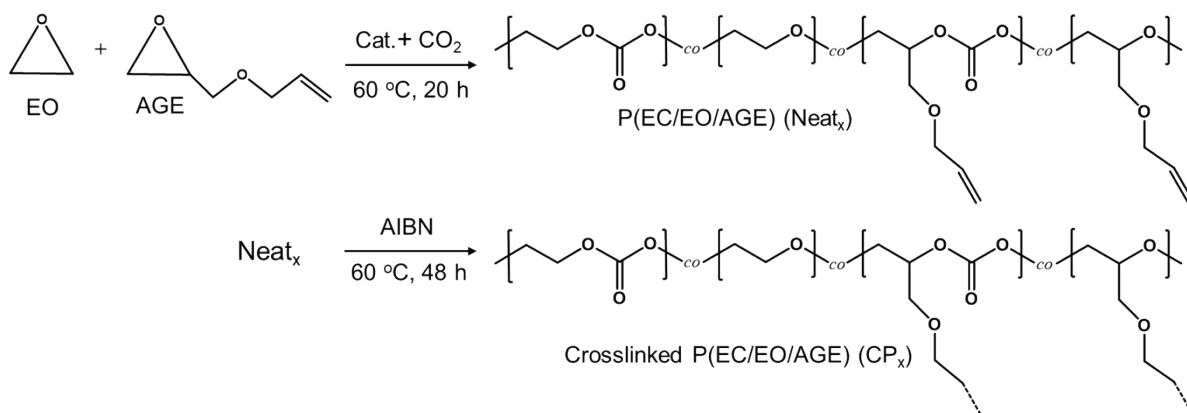

**Scheme S1** Synthesis of random copolymer P(EC/EO/AGE) (Neat<sub>x</sub>) and crosslinked copolymer (CP<sub>x</sub>) (where x represents the AGE ratio).

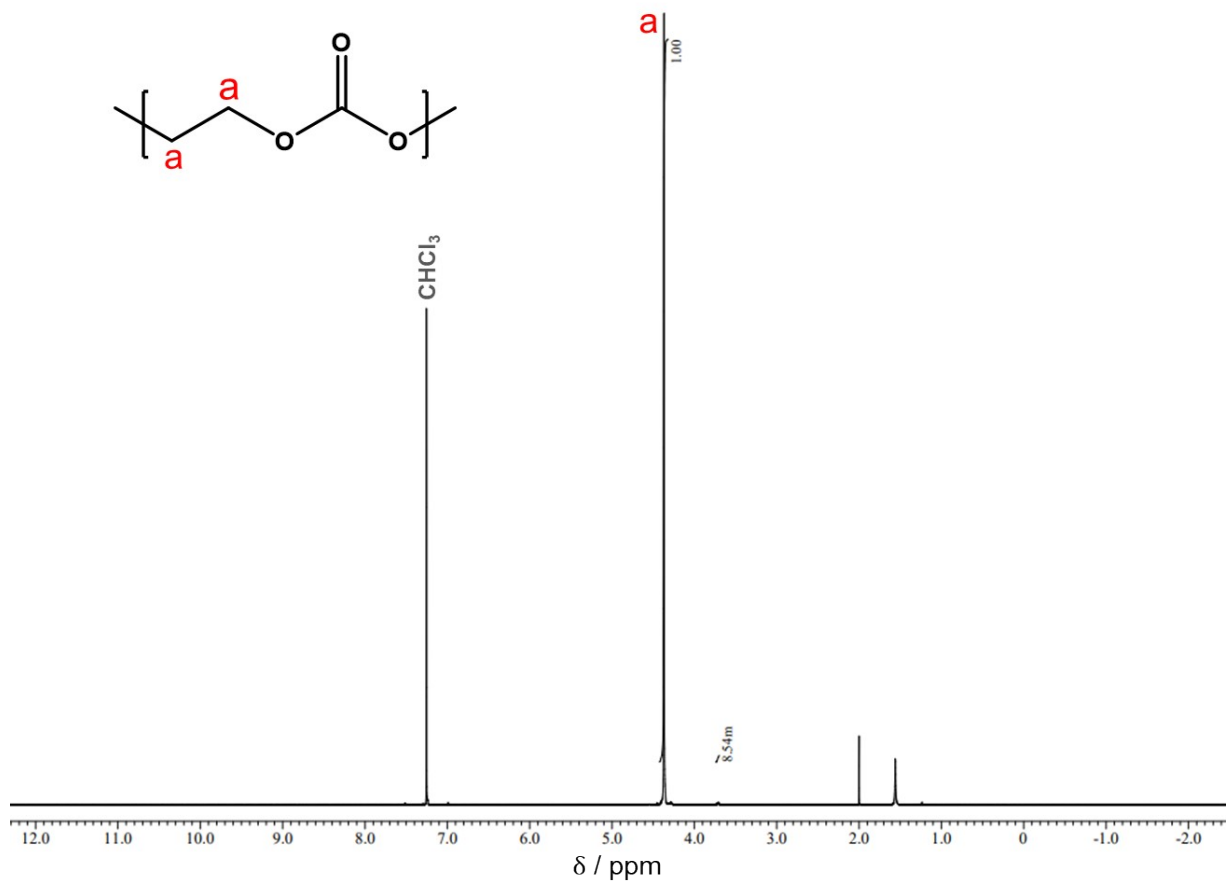

**Figure S1** <sup>1</sup>H NMR spectrum of poly(ethylene carbonate) (PEC).

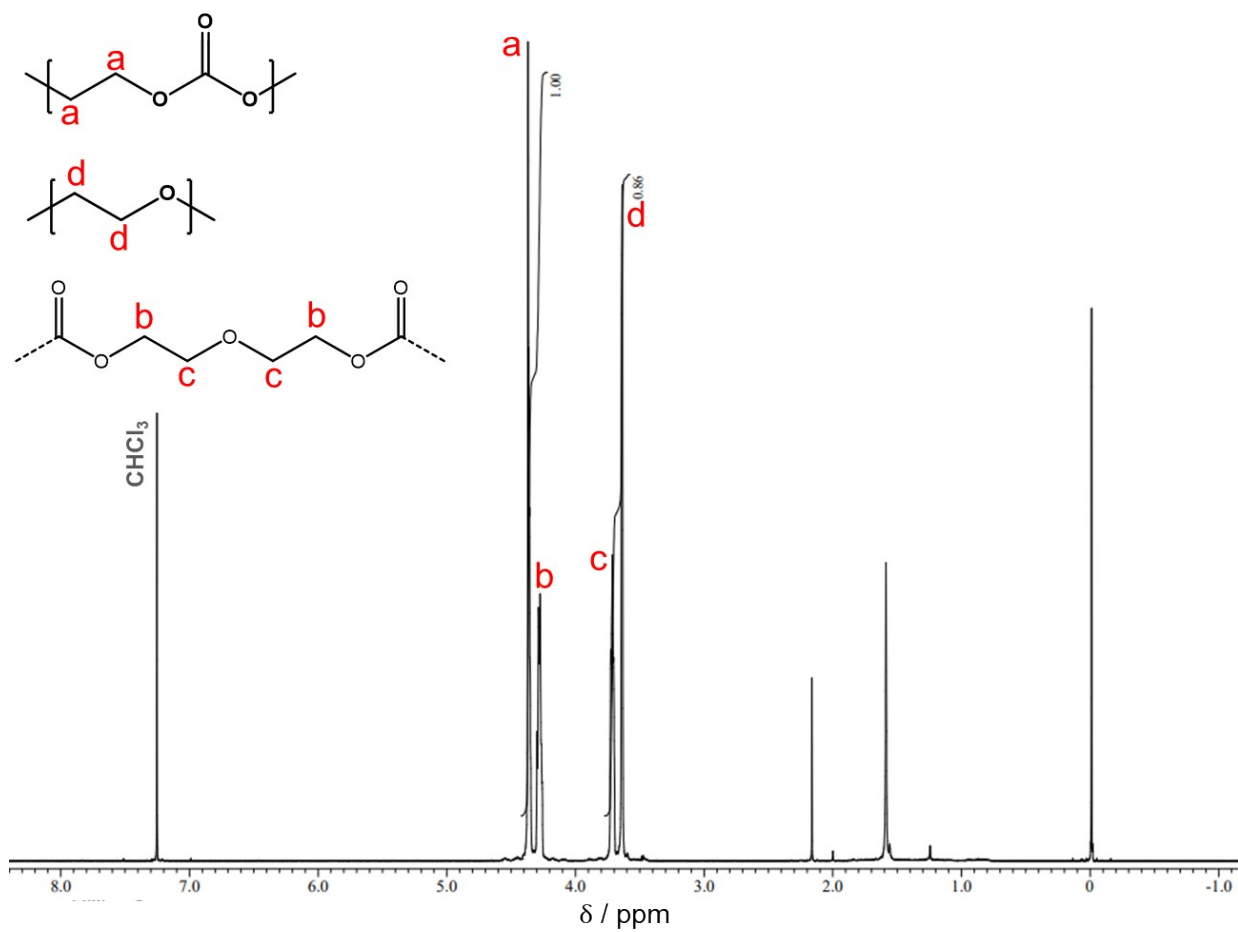

**Figure S2**  $^1\text{H}$  NMR spectrum of poly(ethylene carbonate-co-ethylene oxide) (P(EC/EO)).

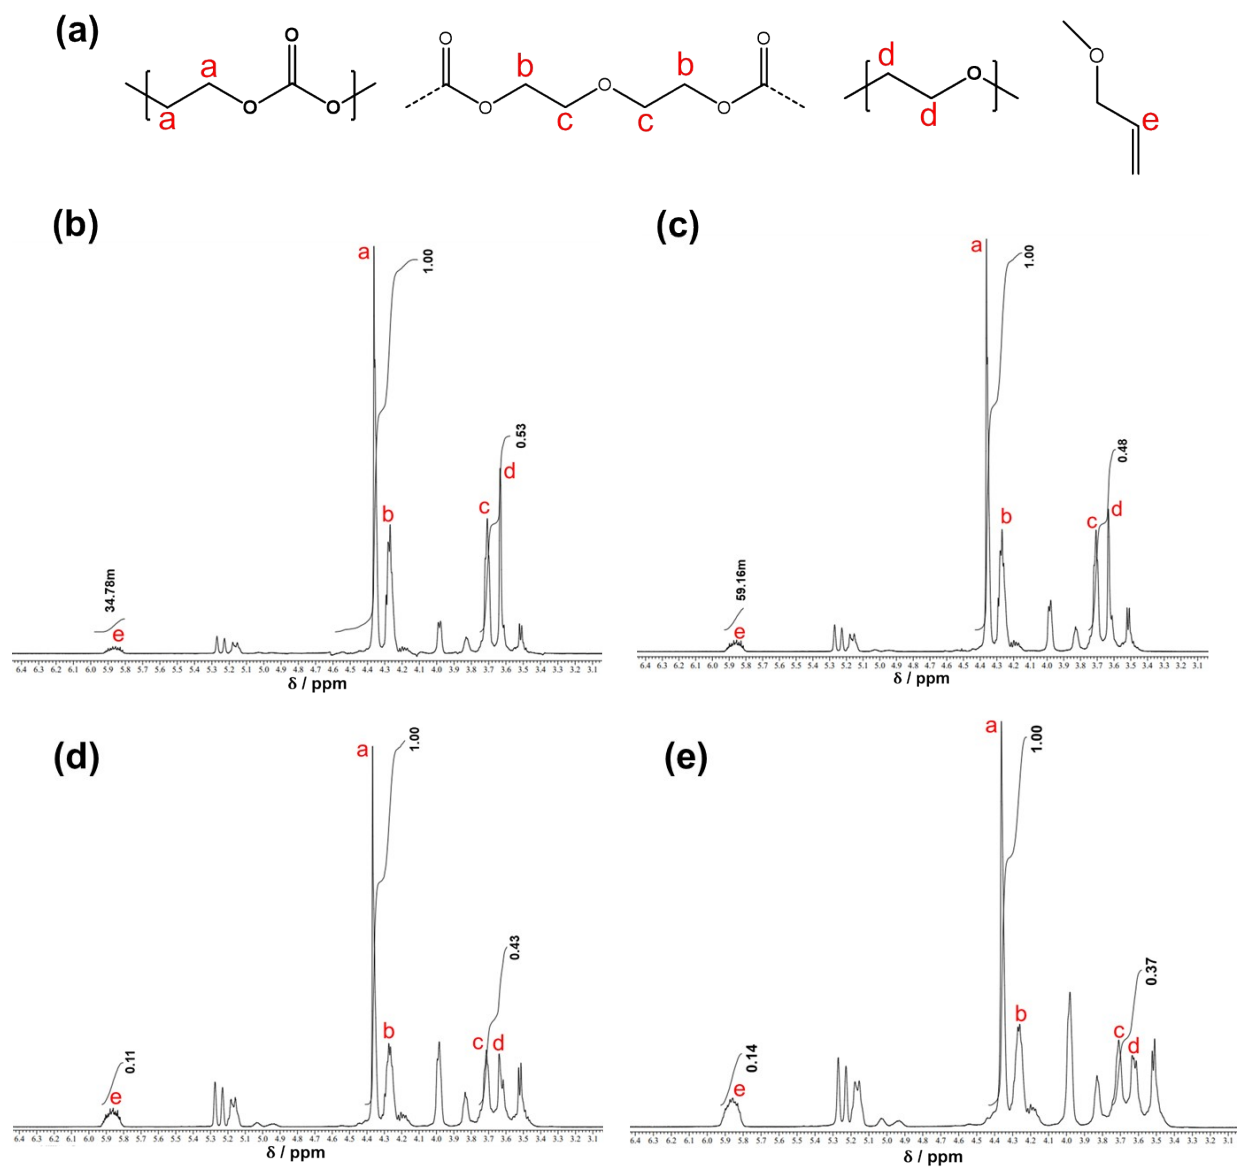

**Figure S3**  $^1\text{H}$  NMR spectrum of P(EC/EO/AGE) ( $\text{Neat}_x$ ), which include the integral peak area of the EC/EO/AGE units. (a) Peak assignment (b)  $\text{Neat}_8$ , (c)  $\text{Neat}_{14}$ , (d)  $\text{Neat}_{23}$ , and (e)  $\text{Neat}_{29}$ .

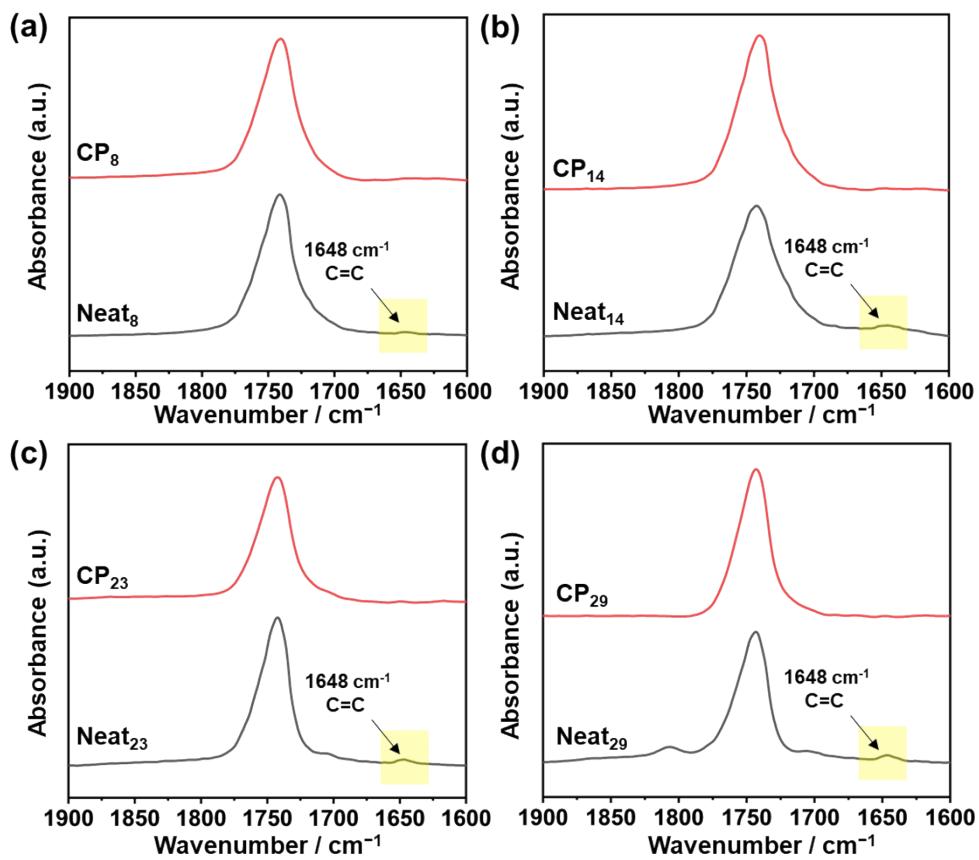

**Figure S4** FT-IR spectra of 1900–1600  $\text{cm}^{-1}$  for the uncrosslinked ( $\text{Neat}_x$ ) and crosslinked copolymers ( $\text{CP}_x$ ) with (a) 8 mol%, (b) 14 mol%, (c) 23 mol%, and (d) 29 mol% of AGE unit.

**Table S1** Mechanical and thermal properties of CPs.

| Crosslinked copolymer | Monomer unit (%) |    |     | EC/EO | Young's modulus (MPa) | Elongation at break (%) | $T_g$ (°C) | $T_{d5}$ (°C) |
|-----------------------|------------------|----|-----|-------|-----------------------|-------------------------|------------|---------------|
|                       | EC               | EO | AGE |       |                       |                         |            |               |
|                       | CP <sub>8</sub>  | 60 | 32  |       |                       |                         |            |               |
| CP <sub>14</sub>      | 58               | 28 | 14  | 2.1   | 6.6                   | 17                      | -24        | 234           |
| CP <sub>23</sub>      | 54               | 23 | 23  | 2.3   | 16.8                  | 16                      | -29        | 242           |
| CP <sub>29</sub>      | 52               | 19 | 29  | 2.7   | 23.5                  | 15                      | -31        | 260           |

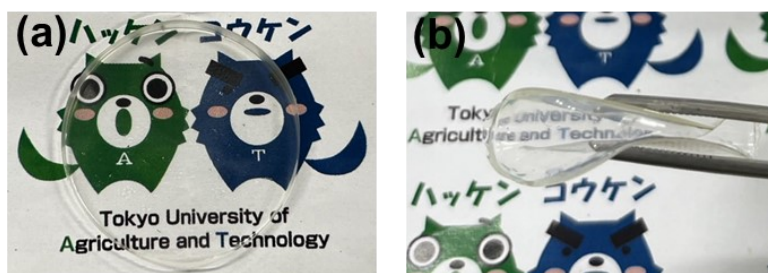

**Figure S5** Photographs of CP<sub>29</sub>. (a) CP<sub>29</sub> ( $\phi = 35$  mm). (b) CP<sub>29</sub> in a bending state.



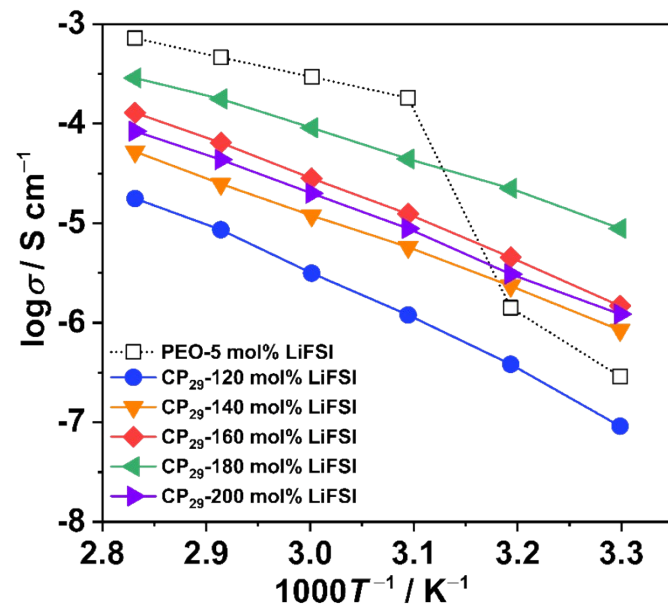

**Figure S6** Temperature dependence of the ionic conductivity for PEO-5 mol% LiFSI and CP<sub>29</sub>-SPEs at various salt concentration.

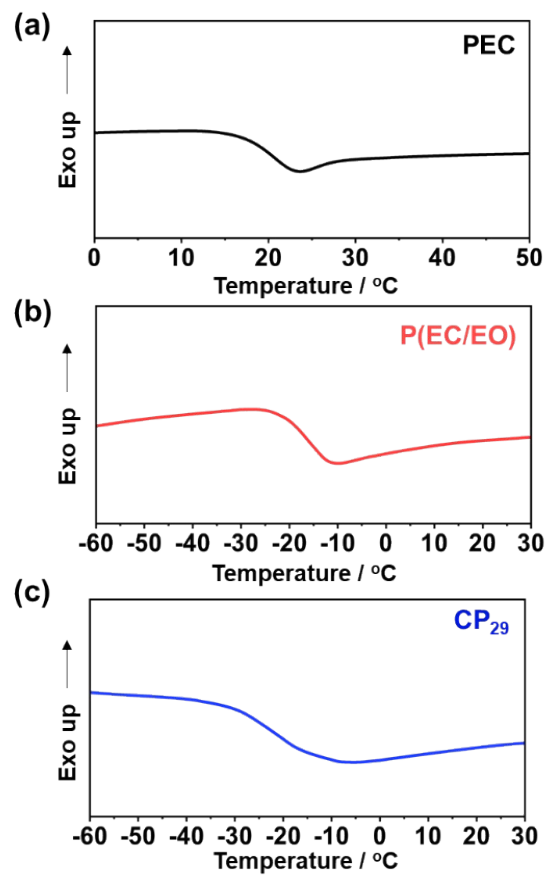

**Figure S7** DSC curves of (a) PEC, (b) P(EC/EO), and (c) CP<sub>29</sub>.

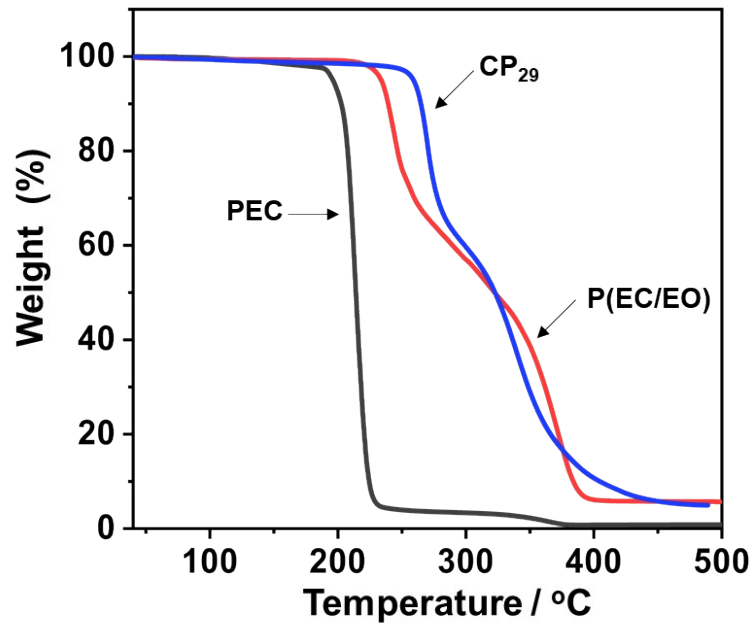

**Figure S8** TGA thermograms of PEC, P(EC/EO), and CP<sub>29</sub>.

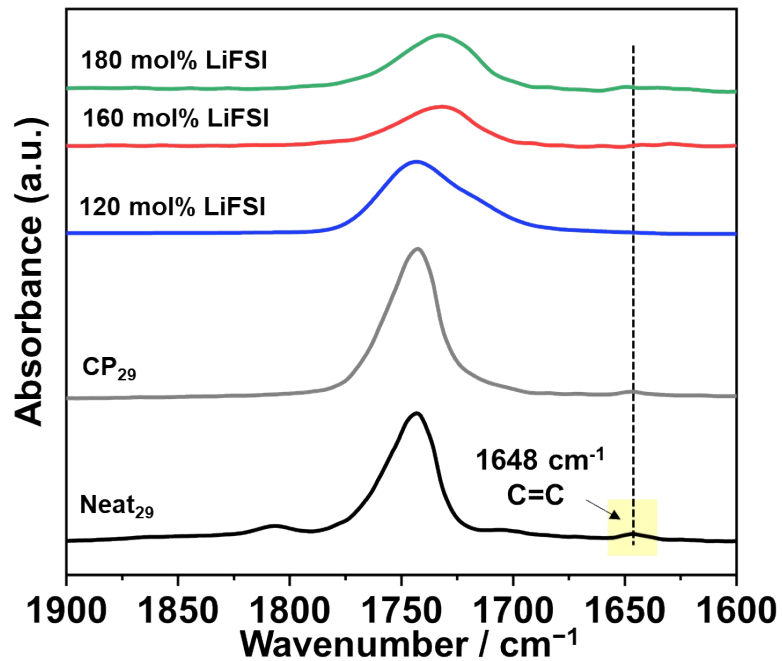

**Figure S9** FT-IR spectra of (a) 1900–1600  $\text{cm}^{-1}$  of the Neat<sub>29</sub> and CP<sub>29</sub> and their electrolytes with LiFSI at various concentrations.

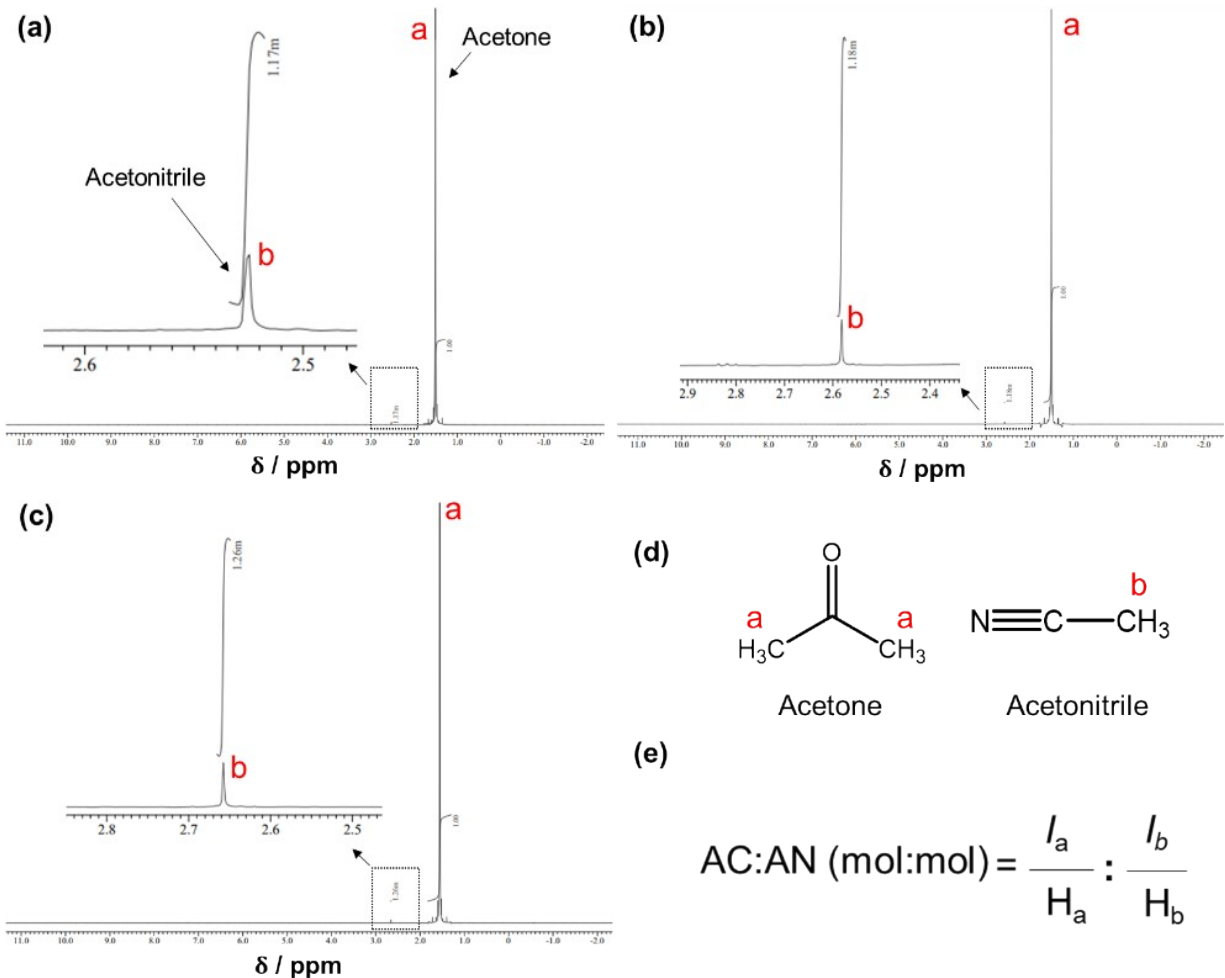

**Figure S10**  $^1\text{H}$  NMR spectrum of residual solvent (acetonitrile, AN) extracted from CP-SPEs and acetone (AC) of (a) CP<sub>29</sub>-120 mol% LiFSI, (b) CP<sub>29</sub>-160 mol% LiFSI, and (c) CP<sub>29</sub>-180 mol% LiFSI. (d) Chemical structure for peak assignments. (e) An equation for the AC:AN (mol:mol) ratio calculation, where  $I$  and  $H$  are the integral area of each peak and the number of protons for each unit, respectively ( $H_a=6$ ,  $H_b=3$ ). The number of molecules of the residual AN was calculated combining the AC:AN ratio and the weight of added AC (0.1 g). Afterwards, the weight of the residual AN (wt%), which was present in the 0.01 g of CP-SPE was calculated. To better understand, we give an example calculation of CP<sub>29</sub>-120mol% LiFSI as follows;

$$= \frac{1.00}{6} \cdot \frac{1.17 \times 10^{-3}}{3}$$

$$\text{Mass of AN (g)} = 1.17 \times 10^{-3} \times 6 \times 0.1 \text{ g} \times 41.05 \text{ g/mol}$$

$$\text{Mass of AN (g)} = 0.000165 \text{ g}$$

$$\text{Mass of AN (wt\%)} = \frac{0.000165 \text{ g} \times 100}{0.0159 \text{ g}}$$

$$\text{Mass of AN (wt\%)} = 1.04 \text{ wt\%}$$

where 58.08 g/mol is molecular weight of acetone, 41.05 g/mol is molecular weight of acetonitrile, and 0.0159 g is a recorded mass of CP<sub>29</sub>-120 mol% LiFSI.

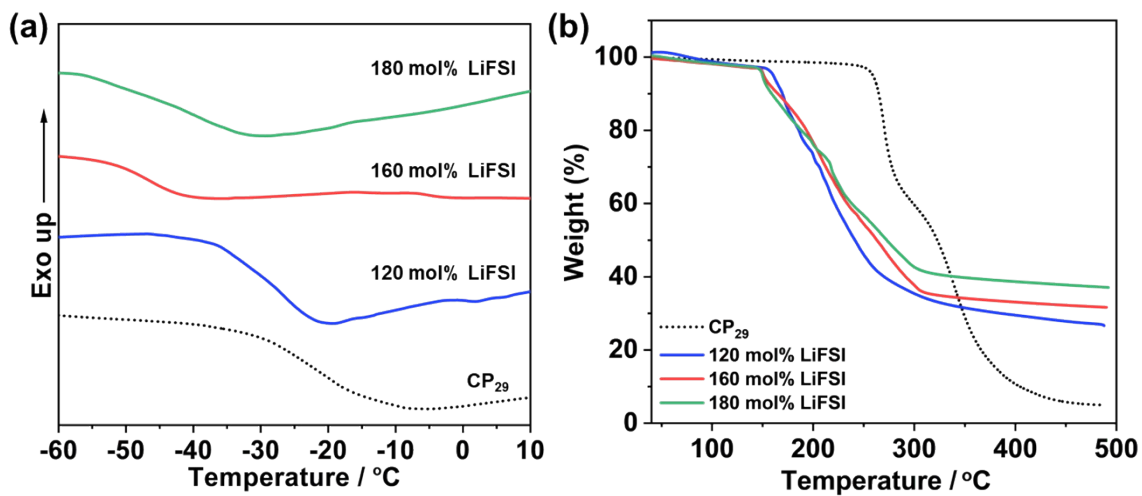

**Figure S11** (a) DSC curves and (b) TGA thermograms of CP<sub>29</sub>-based SPEs at various LiFSI concentrations.

**Table S2** Thermal and mechanical properties of CP<sub>29</sub> electrolytes at different salt concentrations.

| Sample                    | $T_g$<br>(°C) | $T_{d5}$<br>(°C) | Young's<br>modulus<br>(MPa) | Elongation at<br>break (%) |
|---------------------------|---------------|------------------|-----------------------------|----------------------------|
| Original CP <sub>29</sub> | -31           | 260              | 23.5                        | 15                         |
| + 120 mol% LiFSI          | -36           | 160              | 0.80                        | 163                        |
| + 160 mol% LiFSI          | -52           | 151              | 0.10                        | 209                        |
| + 180 mol% LiFSI          | -55           | 149              | 0.09                        | 190                        |



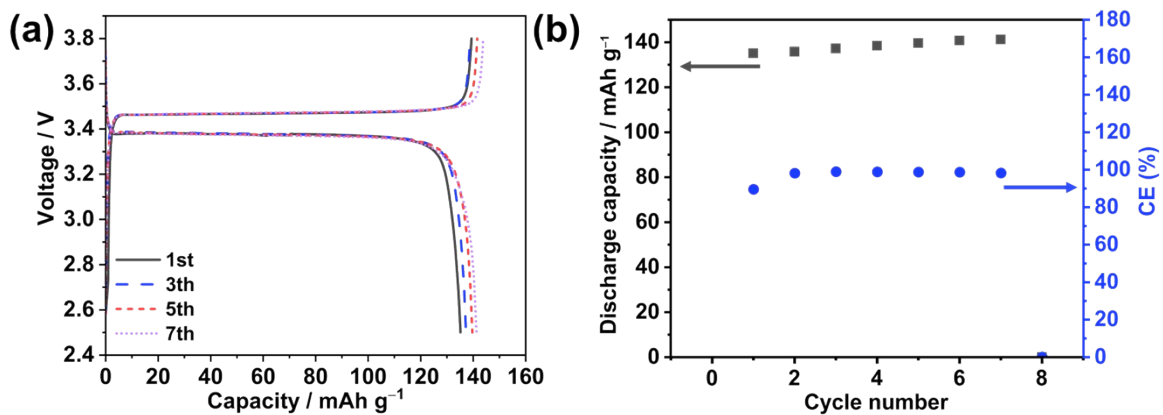

**Figure S12** (a) Voltage profiles of charge/discharge at C/10 rate ( $1C = 160 \text{ mA g}^{-1}$ ) and (b) cycling performance of Li//LFP cell (cathode mass loading:  $2.3 \text{ mg cm}^{-2}$  of active materials) using CP<sub>29</sub>-180 mol% LiFSI as an electrolyte.

**Table S3** Resistance values from fitting EIS curves of Li//LFP cell with CP<sub>29</sub>-160 mol% LiFSI electrolyte at 40 °C using the equivalent circuit.

| Cycle number | $R_1$ (k $\Omega$ ) | $R_2$ (k $\Omega$ ) | $R_3$ (k $\Omega$ ) |
|--------------|---------------------|---------------------|---------------------|
| Fresh        | 1.95                | 1.23                | 7.52                |
| at 100th     | 2.62                | 0.64                | 12.54               |
| at 200th     | 3.58                | 0.85                | 15.30               |
| at 300th     | 4.13                | 1.36                | 23.04               |
| at 400th     | 5.54                | 2.42                | 36.58               |
